# Supplementary material for: Complexation of Al(iii) with gluconate in alkaline to hyperalkaline solutions: formation, stability and structure
Source: Royal Society of Chemistry journal article supplement (doi:10.1039/c3dt51401c), 2013-01-01
Supplement: c3dt51401c.pdf [file c3dt51401c.pdf]

## Electronic Supplementary Information (ESI) for: Complexation of Al(III) with gluconate in alkaline to hyperalkaline solutions: formation, stability and structure

Attila Pallagi,<sup>a</sup> Ágost Gyula Tasi<sup>a</sup>, Gábor Peintler,<sup>b</sup> Péter Forgo,<sup>c</sup> István Pálinkó<sup>d</sup> and Pál Sipos<sup>\*a</sup>

<sup>5</sup> <sup>a</sup> Department of Inorganic and Analytical Chemistry, University of Szeged, Dóm tér 7, Szeged, H-6720 Hungary. Fax: +36 62 544 340; Tel: +36 62 544 054; E-mail: sipos@chem.u-szeged.hu

<sup>b</sup> Department of Physical Chemistry and Material Science, University of Szeged, Aradi Vértanúk tere 1, Szeged, H-6720 Hungary.

<sup>10</sup> <sup>c</sup> Eszterházy Károly College, Institute of Food Science, Leányka út 6/D, Eger, Hungary.

<sup>d</sup> Department of Organic Chemistry, University of Szeged, Dóm tér 8, Szeged, H-6720 Hungary

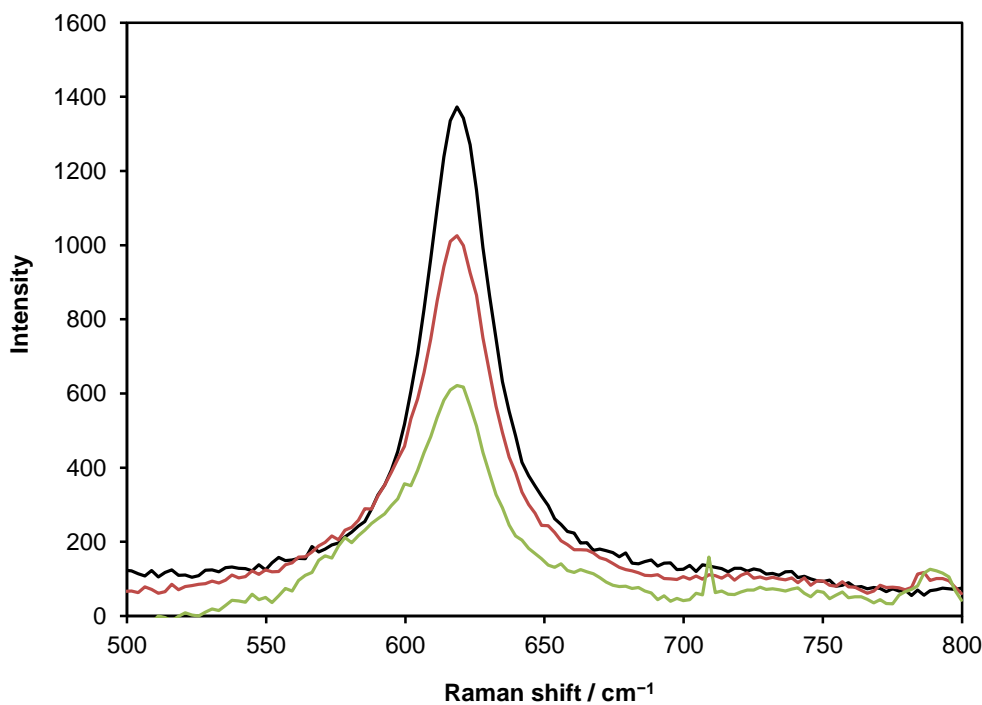

**Fig. S1** Background corrected Raman spectra of aluminate solutions

<sup>15</sup> ( $[\text{Al}(\text{OH})_4^-]_{\text{T}} = 0.4 \text{ M}$ ;  $[\text{NaOH}]_{\text{T}} = 0.8 \text{ M}$ ) with various added  $\text{Gluc}^-$  concentrations

(—: 0 M; —: 0.2 M; —: 0.4 M)

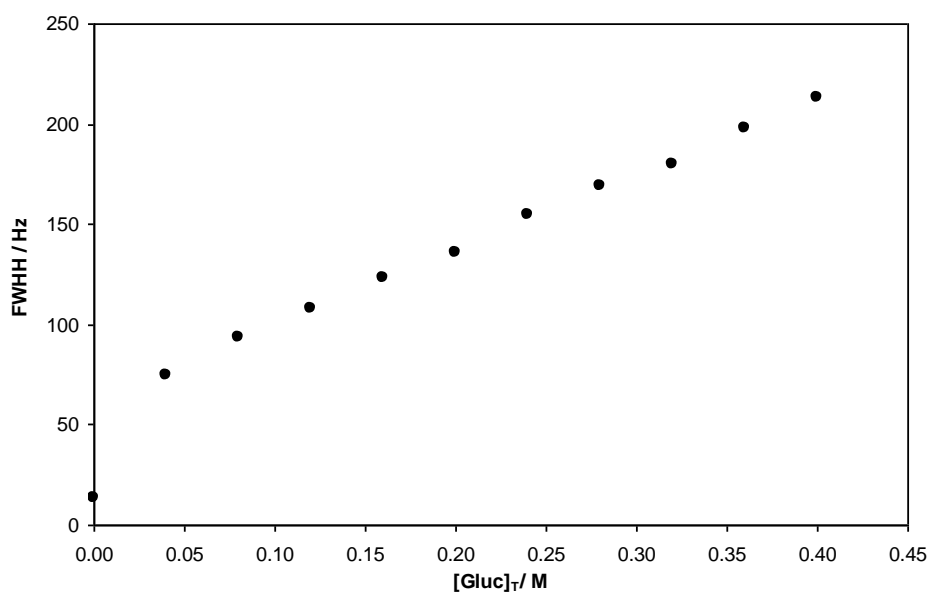

**Fig. S2** The variation of the FWHH of Al on the  $^{27}\text{Al}$  NMR spectra with rising  $\text{Gluc}^-$  concentration in solutions of  $[\text{Al}(\text{OH})_4^-]_{\text{T}} = 0.200 \text{ M}$  and  $[\text{NaOH}]_{\text{T}} = 0.400 \text{ M}$

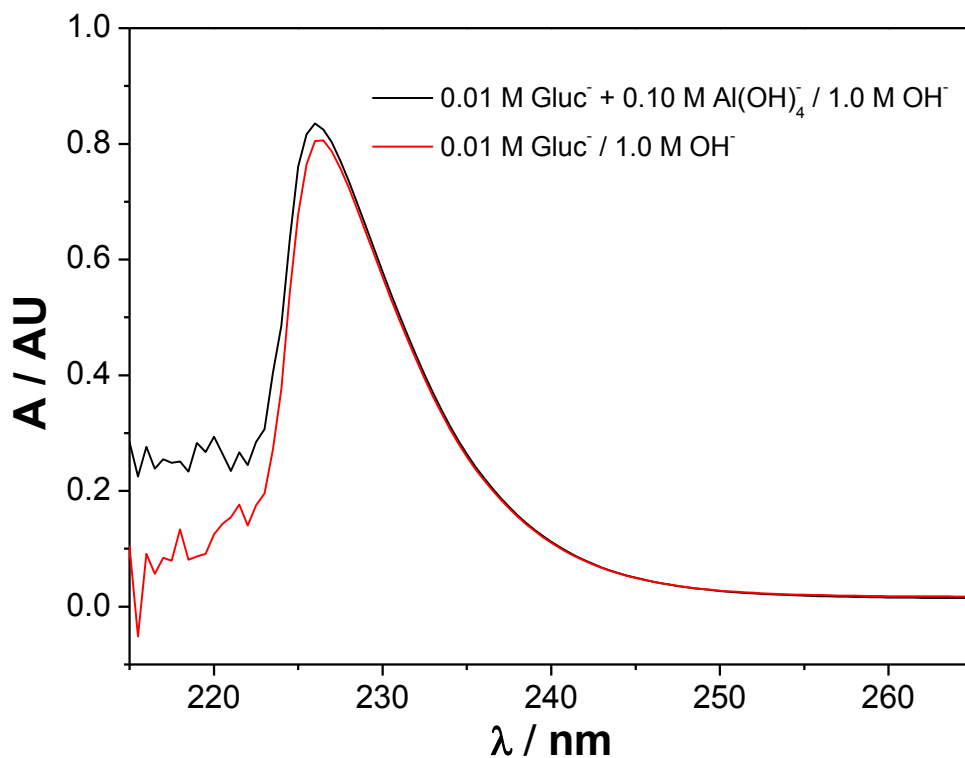

**Fig. S3** The UV-Vis spectra of the  $[\text{Gluc}^-]_{\text{T}}$  (0.01 M) in the absence (red) and the presence of the  $[\text{Al}(\text{OH})_4^-]_{\text{T}}$  (black; 0.10 M) in 1.0 M  $[\text{OH}^-]_{\text{T}}$  medium at 25 °C
